# Supplementary material for: Co-Occurrence of blaOXA-23 in the Chromosome and Plasmid: Increased Fitness in Carbapenem-Resistant Acinetobacter baumannii
Source: MDPI journal article supplement (doi:10.3390/antibiotics10101196), 2021-10-01
Supplement: s1 [file s1]

## Supplementary Materials

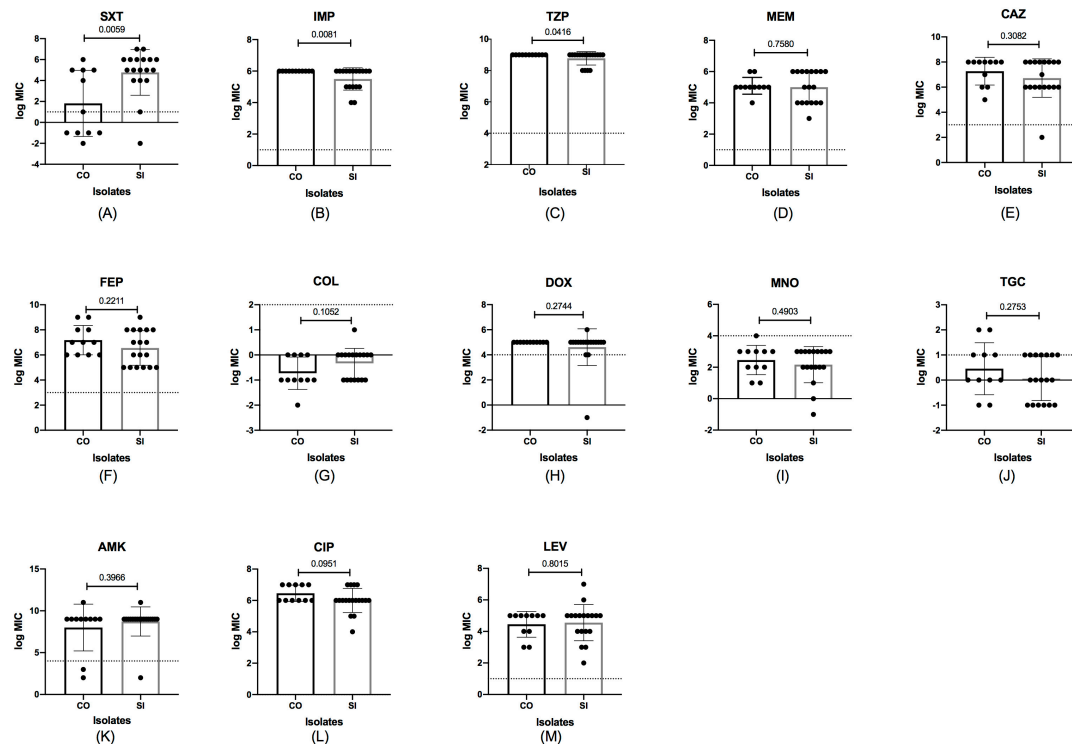

**Figure S1:** Correlation between antibiotics resistance and *bla<sub>OXA-23</sub>* location analyzed by Student's t test. Panels (A) to (M) showed the comparison of the logarithm of MICs of 13 antibiotics to the base of 2 between SI and CO isolates, respectively. If the data possessed unequal standard deviations (SDs), Welch's t tests were executed to correct the variances. The p-value was marked on the figures respectively.  $P < 0.05$  specified a significant difference. The dotted lines displayed the logarithm of sensitive breakpoints to the base of 2.

IMP, imipenem; MEM, meropenem; CAZ, ceftazidime; FEP, cefepime; TZP, piperacillin/tazobactam; COL, colistin; DOX, doxycycline; MNO, minocycline; TGC, tigecycline; AMK, amikacin; CIP, ciprofloxacin; LEV, levofloxacin; SXT, trimethoprim/sulfamethoxazole.

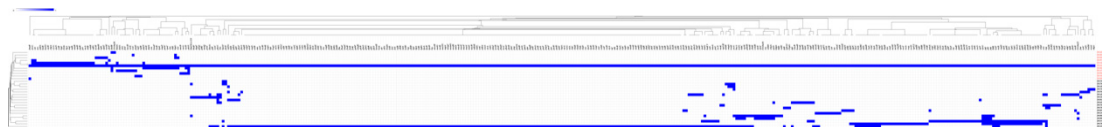

**Figure S2:** Gene presence and absence variants of CO and SI isolates. The red marked isolates represent CO isolates. The blue color shades indicated presence of the genes.

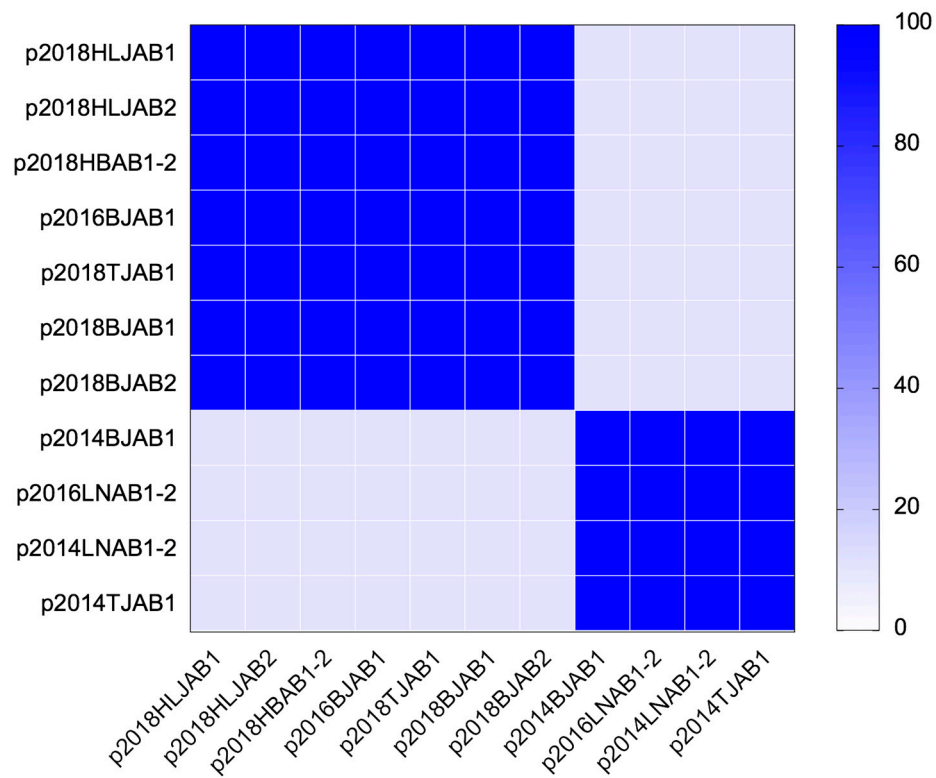

**Figure S3:** Blast analysis and visualization of *bla*<sub>OXA-23</sub>-carrying plasmids. The blue color shades revealed the coverage and identity of sequence.

**Table S1:** Phenotypic and genotypic characteristics of SI *A. baumannii* isolates.

| Isolate     | Year of isolation | Characteristic              |                |             |               |                                   |                    | MIC (µg/mL) |           |             |          |      |          |             |             |             |          |               |              |     |
|-------------|-------------------|-----------------------------|----------------|-------------|---------------|-----------------------------------|--------------------|-------------|-----------|-------------|----------|------|----------|-------------|-------------|-------------|----------|---------------|--------------|-----|
|             |                   | Location                    | Origin /Source | ST s-Pa sur | ST s-Ox for d | Location of bla <sub>OXA-23</sub> | Copy number of bla | Imipenem    | Meropenem | Ceftazidime | Cefepime | TZP  | Colistin | Doxycycline | Minocycline | Tigecycline | Amikacin | Ciprofloxacin | Levofloxacin | SXT |
| 2016 BJAB 2 | 2016              | China: Beijing              | blood          | 2           | 208           | plasmid                           | 1                  | 64          | 64        | 64          | 64       | >256 | 1        | 64          | 8           | 2           | >256     | >32           | 32           | 32  |
| 2018 BJAB 3 | 2018              | China: Beijing              | blood          | 2           | 1968          | chromosome                        | 2                  | 64          | 64        | >128        | 128      | >256 | 1        | 32          | 8           | 2           | >256     | >64           | 32           | 32  |
| 2013 GDA B1 | 2013              | China: Guangzhou, Guangdong | blood          | 2           | 195           | chromosome                        | 1                  | 64          | 64        | >128        | 256      | >256 | 1        | 32          | 8           | 1           | >256     | >32           | 32           | 64  |
| 2013 LNA B1 | 2013              | China: Shenyang, Liaoning   | sputum         | 2           | 208           | chromosome                        | 1                  | 16          | 8         | 64          | 32       | 256  | 0.5      | 32          | 8           | 1           | >256     | >32           | 32           | 32  |

|                   |          |                                   |            |         |         |                    |   |     |    |      |     |      |     |     |     |     |           |     |     |      |
|-------------------|----------|-----------------------------------|------------|---------|---------|--------------------|---|-----|----|------|-----|------|-----|-----|-----|-----|-----------|-----|-----|------|
| 2013<br>GDA<br>B2 | 201<br>3 | China:<br>Guangzhou,<br>Guangdong | sputu<br>m | 2       | 19<br>5 | chro<br>moso<br>me | 2 | 64  | 64 | >128 | 256 | >256 | 0.5 | 32  | 8   | 2   | >256      | >32 | 64  | 128  |
| 2013<br>LNA<br>B2 | 201<br>3 | China:<br>Shenyang,<br>Liaoning   | sputu<br>m | 2       | 20<br>8 | chro<br>moso<br>me | 1 | 32  | 16 | 64   | 32  | >256 | 0.5 | 32  | 8   | 0.5 | >256      | >32 | 16  | 64   |
| 2014<br>BJAB<br>2 | 201<br>4 | China:<br>Beijing                 | urine      | 2       | 19<br>5 | chro<br>moso<br>me | 2 | 32  | 32 | >128 | 256 | >256 | 1   | 32  | 8   | 2   | >256      | >64 | 32  | 128  |
| 2014<br>SXA<br>B1 | 201<br>4 | China: Xi'an,<br>Shanxi           | blood      | 2       | 19<br>5 | chro<br>moso<br>me | 1 | >32 | 64 | >128 | 256 | >256 | 1   | 32  | 4   | 0.5 | >256      | 64  | 8   | 32   |
| 2015<br>BJAB<br>1 | 201<br>6 | China:<br>Beijing                 | blood      | 2       | 20<br>8 | plas<br>mid        | 1 | >32 | 64 | 128  | 128 | >256 | 1   | 32  | 8   | 1   | >102<br>4 | 64  | 16  | 64   |
| 2011<br>GDA<br>B1 | 201<br>1 | China:<br>Guangzhou,<br>Guangdong | sputu<br>m | 2       | 45<br>7 | chro<br>moso<br>me | 1 | 16  | 16 | >128 | 128 | 256  | 1   | 32  | 4   | 2   | >256      | >32 | 32  | 0.25 |
| 2013<br>BJAB<br>1 | 201<br>3 | China:<br>Beijing                 | sputu<br>m | 2       | 19<br>5 | chro<br>moso<br>me | 2 | 64  | 64 | >128 | 256 | >256 | 0.5 | 32  | 4   | 2   | >256      | >32 | 16  | 64   |
| 2013<br>BJAB<br>2 | 201<br>3 | China:<br>Beijing                 | blood      | 57<br>0 | 49<br>3 | chro<br>moso<br>me | 1 | 32  | 16 | 64   | 64  | >256 | 1   | 0.5 | 0.5 | 0.5 | >256      | >32 | >64 | 2    |

|                   |      |                                   |                              |   |          |                    |   |     |    |      |      |      |     |    |   |     |      |     |    |    |
|-------------------|------|-----------------------------------|------------------------------|---|----------|--------------------|---|-----|----|------|------|------|-----|----|---|-----|------|-----|----|----|
| 2010<br>SXA<br>B1 | 2010 | China: Xi'an,<br>Shanxi           | sputu<br>m                   | 2 | 19<br>62 | plas<br>mid        | 1 | 64  | 64 | 64   | 32   | 256  | 0.5 | 16 | 2 | 0.5 | >256 | 32  | 8  | 16 |
| 2010<br>ZJA<br>B1 | 2010 | China:<br>Hangzhou,<br>Zhejiang   | blood                        | 2 | 21<br>8  | chro<br>moso<br>me | 1 | 32  | 16 | 64   | 32   | 256  | 1   | 32 | 4 | 0.5 | 4    | 32  | 16 | 16 |
| 2012<br>BJAB<br>1 | 2012 | China:<br>Beijing                 | blood                        | 2 | 19<br>62 | chro<br>moso<br>me | 2 | >32 | 16 | 64   | 32   | >256 | 1   | 32 | 4 | 1   | >256 | >64 | 32 | 64 |
| 2012<br>GDA<br>B1 | 2012 | China:<br>Guangzhou,<br>Guangdong | bronch<br>ial                | 2 | 20<br>8  | chro<br>moso<br>me | 1 | >32 | 32 | 64   | 32   | >256 | 0.5 | 32 | 8 | 1   | >256 | 64  | 32 | 64 |
| 2014<br>LNA<br>B2 | 2014 | China:<br>Shenyang,<br>Liaoning   | blood                        | 2 | 36<br>8  | chro<br>moso<br>me | 2 | >32 | 32 | 4    | 64   | >256 | 0.5 | 16 | 1 | 0.5 | >256 | 16  | 4  | 16 |
| 2018<br>BJAB<br>4 | 2018 | China:<br>Beijing                 | trache<br>al<br>aspirat<br>e | 2 | 19<br>68 | chro<br>moso<br>me | 1 | 32  | 16 | >128 | >256 | >256 | 2   | 32 | 4 | 2   | >256 | >64 | 32 | 32 |

MIC, minimum inhibitory concentration; TZP, piperacillin/tazobactam; SXT, trimethoprim/sulfamethoxazo.
